1 **Title: Gut bacterial tyrosine decarboxylases restrict the bioavailability of**  
2 **levodopa, the primary treatment in Parkinson's disease**

3 **Authors:** Sebastiaan P. van Kessel<sup>1</sup>, Alexandra K. Frye<sup>1</sup>, Ahmed O. El-Gendy<sup>1,2</sup>, Maria Castejon<sup>1</sup>, Ali  
4 Keshavarzian<sup>3</sup>, Gertjan van Dijk<sup>4</sup>, Sahar El Aidy<sup>1\*†</sup>

5 **Affiliations:**

6 <sup>1</sup> Department of Molecular Immunology and Microbiology, Groningen Biomolecular Sciences and  
7 Biotechnology Institute (GBB), University of Groningen, Groningen, The Netherlands.

8 <sup>2</sup> Department of Microbiology and Immunology, Faculty of Pharmacy, Beni-Suef University, Beni-  
9 Suef, Egypt

10 <sup>3</sup> Division of Digestive Disease and Nutrition, Section of Gastroenterology, Department of Internal  
11 Medicine, Rush University Medical Center, Chicago, Illinois.

12 <sup>4</sup> Department of Behavioral Neuroscience, Groningen Institute for Evolutionary Life Sciences  
13 (GELIFES), University of Groningen, Groningen, The Netherlands.

14 \* Corresponding author. Email: sahar.elaidy@rug.nl

15 † Present address: Groningen Biomolecular Sciences and Biotechnology Institute (GBB), University of  
16 Groningen, Nijenborg 7, 9747 AG Groningen, The Netherlands. P:+31(0)503632201.

17 **One Sentence Summary:**

18 L-DOPA conversion by bacterial tyrosine decarboxylase in the small intestine is a significant  
19 explanatory factor for the highly variable L-DOPA dosage regimens required in the treatment of  
20 individual Parkinson's patients.

21

## 22 **Abstract**

23 Human gut bacteria play a critical role in the regulation of immune and metabolic systems, as well as  
24 in the function of the nervous system. The microbiota senses its environment and responds by  
25 releasing metabolites, some of which are key regulators of human health and disease. In this study, we  
26 identify and characterize gut-associated bacteria in their ability to decarboxylate L-3,4-  
27 dihydroxyphenylalanine (L-DOPA) via the tyrosine decarboxylases, which are mainly present in the  
28 class Bacilli. Although the bacterial tyrosine decarboxylases have a higher affinity for tyrosine  
29 compared to L-DOPA, this does not affect their ability to convert L-DOPA to dopamine, nor does any  
30 inhibitor of the human decarboxylase. This study indicates that *in situ* bioavailability of L-DOPA is  
31 compromised by the gut bacterial tyrosine decarboxylase gene abundance in Parkinson's patients.  
32 Finally, we show that the tyrosine decarboxylase gene abundance in the microbiota of the site of L-  
33 DOPA absorption, the proximal small intestine, significantly influences L-DOPA bioavailability in the  
34 plasma of rats. Our results highlight the role of microbial metabolism in drug bioavailability, and that  
35 specifically, small intestinal abundance of bacterial tyrosine decarboxylase can explain the highly  
36 variable L-DOPA dosage regimens required in the treatment of individual Parkinson's patients.

37

## 38 **Introduction**

39 The complex communities of microbiota inhabiting the mammalian gut have a significant impact on  
40 the health of their host (1). Numerous reports indicate microbiota, and in particular its metabolic  
41 products, have a crucial effect on various health and diseased states. Host immune system and brain  
42 development, metabolism, behavior, stress and pain response have all been reported to be subject to  
43 microbial modulation (2-6). In addition, it is becoming increasingly clear that gut microbiota can play  
44 a detrimental role in the modulation of drug pharmacokinetics and drug bioavailability (7, 8).  
45 Parkinson's disease, the second most common neurodegenerative disorder, affecting 1% of the global  
46 population over the age of 60, has recently been correlated with alterations in microbial gut  
47 composition (9-12). To date, L-DOPA (also termed levodopa) is the most effective treatment available  
48 for Parkinson's patients. In humans, peripheral L-DOPA metabolism involves DOPA decarboxylase,  
49 which converts L-DOPA to dopamine, thus preventing the passage of L-DOPA to its site of action in

50 the brain, as dopamine cannot pass the blood-brain barrier. For this reason, Parkinson's patients are  
51 treated with a DOPA decarboxylase inhibitor (primarily carbidopa) in combination with L-DOPA to  
52 enhance the effectiveness of L-DOPA delivery to the brain. Nonetheless, the pharmacokinetics of L-  
53 DOPA/carbidopa treatment varies significantly among patients, some are resistant to the treatment,  
54 others undergo fluctuating response towards the treatment over time, thus require increasing L-DOPA  
55 dosage regimen leading to increased severity of adverse effects like dyskinesia (13). What remains to  
56 be clarified is whether inter-individual variations in gut microbiota composition play a causative role  
57 in the variation of treatment efficacy.

58 Several amino acid decarboxylases have been annotated in bacteria. Tyrosine decarboxylase genes  
59 have especially been encoded in the genome of several bacterial species in the genera *Lactobacillus*  
60 and *Enterococcus* (14, 15) Though tyrosine decarboxylase is named for its capacity to decarboxylate  
61 L-tyrosine to produce tyramine, it might also have the ability to decarboxylate L-DOPA to produce  
62 dopamine (15) due to the high similarity of the chemical structures of these substrates. This implies  
63 that tyrosine decarboxylase produced by gut microbiota might interfere with L-DOPA bioavailability,  
64 which could be of clinical significance in the L-DOPA treatment of Parkinson's patients.

65 The aim of the present study is to parse out the effect of L-DOPA metabolizing bacteria, particularly  
66 in the proximal small intestine, where L-DOPA is absorbed. Initially, we established the tyrosine  
67 decarboxylases present in small intestinal bacteria efficiently converted L-DOPA to dopamine,  
68 confirming their capacity to modulate the *in situ* bioavailability of the primary drug used in the  
69 treatment of Parkinson's patients. We show that higher relative abundance of bacterial tyrosine  
70 decarboxylase in fecal samples of Parkinson's patients positively correlates with higher daily L-DOPA  
71 dosage requirement and duration of disease. We further confirm our findings in rats orally  
72 administered a mixture of L-DOPA/carbidopa, illustrating that L-DOPA levels in plasma negatively  
73 correlate with the abundance of bacterial tyrosine decarboxylase gene in the proximal small intestine.

74

## 75 **Results**

### 76 **Proximal small intestinal bacteria convert L-DOPA to dopamine**

77 To determine whether proximal small intestinal microbiota maintain the ability to metabolize L-  
78 DOPA, luminal samples from the jejunum of wild-type Groningen rats were incubated *in vitro* with L-  
79 DOPA and analyzed by High-Performance Liquid Chromatography with Electrochemical Detection  
80 (HPLC-ED). The chromatograms revealed that L-DOPA decarboxylation (**Fig. 1A**) coincides with the  
81 conversion of tyrosine to tyramine (**Fig. 1B-E**). In addition, no other metabolites derived from L-  
82 DOPA were detected. To support the *ex vivo* experiment results, the uptake of L-DOPA was  
83 quantified in plasma samples from specific pathogen free and germ-free female C57 BL/6J mice after  
84 oral gavage with L-DOPA. HPLC-ED analysis revealed higher levels of L-DOPA and its metabolites  
85 dopamine and DOPAC (3,4-Dihydroxyphenylacetic acid) in plasma samples of germ-free mice  
86 compared to their conventional counterparts (**Fig. S1**). Taken together, the results suggest a tyrosine  
87 decarboxylase is involved in L-DOPA metabolism by gut bacteria, which may, in turn, interfere with  
88 L-DOPA uptake in the proximal small intestine.

### 89 **Tyrosine decarboxylase is responsible for L-DOPA decarboxylation**

90 The coinciding tyrosine and L-DOPA decarboxylation observed in the luminal content of jejunum was  
91 the basis of our hypothesis that tyrosine decarboxylase is the enzyme involved in both conversions.  
92 Species of the genera *Lactobacillus* and *Enterococcus* have been reported to encode this enzyme (14-  
93 16). To investigate whether these genera indeed represent the main tyrosine decarboxylase encoding  
94 bacterial groups of the small intestine microbiota, the tyrosine decarboxylase protein (EOT87933)  
95 from the laboratory strain *Enterococcus faecalis* v583 was used as a query to search the US National  
96 Institutes of Health Human Microbiome Project (HMP) protein database, to identify whether other  
97 (small intestinal) gut bacteria also encode tyrosine decarboxylases. This analysis exclusively identified  
98 tyrosine decarboxylase proteins in species belonging to the Bacilli class, including more than 50  
99 *Enterococcus* strains (mainly *E. faecium* and *E. faecalis*) and several *Lactobacillus* and  
100 *Staphylococcus* species (**Fig. S2A**). Next, we aligned the genome of *E. faecalis* v583 with two gut  
101 bacterial isolates, *E. faecium* W54, and *L. brevis* W63, illustrating the conservation of the tyrosine

102 decarboxylase (*tdc*)-operon among these species (**Fig. 2A**). Intriguingly, analysis of *E. faecium*  
103 genomes revealed that this species encodes a second, paralogous *tdc* gene (<sup>P</sup>TDC<sub>EFM</sub>) that did not align  
104 with the conserved *tdc*-operon and was absent from the other species (**Fig. 2A, Fig. S2A, Data file**  
105 **S1**).

106 To support our *in silico* data, a comprehensive screening of *E. faecalis* v583, *E. faecium* W54, and *L.*  
107 *brevis* W63 and 77 additional clinical and human isolates of *Enterococcus* was performed. All  
108 *Enterococci* isolates and *L. brevis* were able to convert tyrosine and L-DOPA into tyramine and  
109 dopamine, respectively (**Fig. 2B-D, Table S1**). Notably, our HPLC-ED analysis revealed considerable  
110 variability among the tested strains with regard to their efficiency to decarboxylate L-DOPA. *E.*  
111 *faecium* and *E. faecalis* were drastically more efficient at converting L-DOPA to dopamine, compared  
112 to *L. brevis*. Growing *L. brevis* in different growth medium did not change the L-DOPA  
113 decarboxylation efficacy (**Fig. S2B,C**). To eliminate the possibility that other bacterial amino acid  
114 decarboxylases is involved in L-DOPA conversion observed in the jejunal content we expanded our  
115 screening to include live bacterial species harboring PLP-dependent amino acid decarboxylases  
116 previously identified by Williams et al (17). None of the tested bacterial strains encoding different  
117 amino acid decarboxylases could decarboxylate L-DOPA (**Fig. S2D-G, Table S2**).

118 To verify that the tyrosine decarboxylase gene is solely responsible for L-DOPA decarboxylation in  
119 *Enterococcus*, wild type *E. faecalis* v583 (EFS<sup>WT</sup>) was compared with a mutant strain (EFS<sup>ΔTDC</sup>) in  
120 which both the tyrosine decarboxylase gene (*tdcA*) and tyrosine transporter (*tyrP*) were deleted (14),  
121 (**Fig. 2E**). Overnight incubation of EFS<sup>WT</sup> and EFS<sup>ΔTDC</sup> with L-DOPA resulted in production of  
122 dopamine in the supernatant of EFS<sup>WT</sup> but not EFS<sup>ΔTDC</sup> (**Fig. 2F**), confirming the pivotal role of these  
123 genes in this conversion. To rule out that deletion of *tyrP* alone could explain the observed result by an  
124 impaired L-DOPA import, cell-free protein extracts were incubated with 1 mM L-DOPA overnight at  
125 37°C. While EFS<sup>WT</sup> converted all supplied L-DOPA into dopamine, no dopamine production was  
126 observed in the EFS<sup>ΔTDC</sup> cell-free protein extracts (**Fig. 2G**). Collectively, results show tyrosine  
127 decarboxylase is encoded by gut bacterial species known to dominate the proximal small intestine and  
128 that this enzyme is exclusively responsible for converting L-DOPA to dopamine by these bacteria,  
129 although the efficiency of that conversion displays considerable species-dependent variability.

130 **High levels of tyrosine do not prevent bacterial decarboxylation of L-DOPA**

131 To test whether the availability of the primary substrate for bacterial tyrosine decarboxylases (i.e.,  
132 tyrosine) could inhibit the uptake and decarboxylation of L-DOPA, the growth, metabolites, and pH  
133 (previously shown to affect the expression of tyrosine decarboxylases (14)) of *E. faecium* v583 and *E.*  
134 *faecalis* W54 were analyzed over time. 100  $\mu$ M L-DOPA was added to the bacterial cultures, whereas  
135 approximately 500  $\mu$ M tyrosine was present in the growth media. Remarkably, L-DOPA and tyrosine  
136 were converted simultaneously, even in the presence of these excess levels of tyrosine (1:5 L-DOPA  
137 to tyrosine), albeit at a slower conversion rate for L-DOPA (**Fig. 3A-B**). Notably, the decarboxylation  
138 reaction appeared operational throughout the exponential phase of growth for *E. faecalis*, whereas it is  
139 only observed in *E. faecium* when this bacterium entered the stationary phase of growth, suggesting  
140 differential regulation of the tyrosine decarboxylase expression in these species.

141 To further characterize the substrate specificity and kinetic parameters of the bacterial tyrosine  
142 decarboxylases, tyrosine decarboxylase genes from *E. faecalis* v583 (TDC<sub>EFS</sub>) and *E. faecium* W54  
143 (TDC<sub>EFM</sub> and <sup>P</sup>TDC<sub>EFM</sub>) were expressed in *Escherichia coli* BL21 (DE3) and then purified. Michaelis-  
144 Menten kinetics indicated each of the studied enzymes had a significantly higher affinity ( $K_m$ ) (**Fig.**  
145 **3C-I**) and catalytic efficiency ( $K_{cat}/K_m$ ) for tyrosine than for L-DOPA (**Table 1**). Despite the  
146 differential substrate affinity, our findings illustrate that high levels of tyrosine do not prevent the  
147 decarboxylation of L-DOPA in batch culture.

148 **Carbidopa is a potent inhibitor for the human decarboxylase but not bacterial decarboxylases**

149 To assess the extent to which human DOPA decarboxylase inhibitors could affect bacterial  
150 decarboxylases, several human DOPA decarboxylase inhibitors (carbidopa, benserazide, and  
151 methyldopa) were tested on purified bacterial tyrosine decarboxylase and on the corresponding  
152 bacterial batch cultures carrying the gene. Comparison of the given inhibitory constants ( $K_i^{TDC}/K_i^{DDC}$ )  
153 demonstrates carbidopa to be a 1.4-1.9 x 10<sup>4</sup> times more potent inhibitor of human DOPA  
154 decarboxylase than bacterial tyrosine decarboxylases (**Fig. 4A, Fig. S3; Table S3**). This is best  
155 illustrated by the observation that L-DOPA conversion by *E. faecium* W54 and *E. faecalis* v583 batch  
156 cultures (OD<sub>600</sub> = ~2.0) was unaffected by co-incubation with carbidopa (equimolar or 4-fold carbidopa

157 relative to L-DOPA) (**Fig. 4B-C, S4A**). Analogously, benserazide and methyldopa did not inhibit the  
158 L-DOPA decarboxylation activity in *E. faecalis* or *E. faecium* (**Fig. S4B-C**).

159 These findings demonstrate the commonly applied inhibitors of human DOPA decarboxylase in L-  
160 DOPA combination therapy do not inhibit bacterial tyrosine decarboxylase dependent L-DOPA  
161 conversion, implying L-DOPA/carbidopa combination therapy for Parkinson's patients would not  
162 affect the metabolism of L-DOPA by *in situ* bacteria.

### 163 **L-DOPA dosage regimen correlate with tyrosine decarboxylase gene abundance in Parkinson's** 164 **patients**

165 To determine whether the considerable variation in L-DOPA dosage required for individual  
166 Parkinson's patients could be attributed to the abundance of tyrosine decarboxylase genes in the gut  
167 microbiota, fecal samples were collected from male and female Parkinson's patients (**Table S4**) on  
168 different doses of L-DOPA/carbidopa treatment (ranging from 300 up to 1100 mg L-DOPA per day).  
169 Tyrosine decarboxylase gene-specific primers were used to quantify its relative abundance within the  
170 gut microbiota by qPCR (**Fig. S5**). Remarkably, Pearson *r* correlation analyses showed a strong  
171 positive correlation ( $r = 0.70$ ,  $R^2 = 0.49$ ,  $p \text{ value} = 0.024$ ) between bacterial tyrosine decarboxylase  
172 relative abundance and L-DOPA treatment dose (**Fig. 5A**), as well as with the duration of disease (**Fig.**  
173 **5B**). At this stage, it is unclear whether the relative abundance of tyrosine decarboxylase in fecal  
174 samples is a reflection of its abundance in the small intestinal microbiota. This is of particular  
175 importance because L-DOPA is absorbed in proximal small intestine, and reduction in its  
176 bioavailability by bacterial tyrosine decarboxylase activity in the context of Parkinson's patients'  
177 medication regimens would only be relevant in that intestinal region. Still, the selective prevalence of  
178 tyrosine decarboxylase encoding genes in signature microbes of the small intestine microbiota  
179 supports the idea that obtained results from fecal samples are a valid representation of tyrosine  
180 decarboxylase in the small intestinal microbiota. Moreover, the significant relatedness of the relative  
181 abundance of tyrosine decarboxylase in the fecal microbiota and the required L-DOPA dosage as well  
182 as disease duration strongly supports a role for bacterial tyrosine decarboxylase in L-DOPA  
183 bioavailability.

184



## 185 Tyrosine decarboxylase-gene abundance in small intestine correlates with L-DOPA

### 186 bioavailability in rats

187 To further consolidate the concept that tyrosine decarboxylase abundance in proximal small intestinal  
188 microbiota affects peripheral levels of L-DOPA in blood and dopamine/L-DOPA ratio in the jejunal  
189 luminal content, male wild-type Groningen rats (n=25) rats were orally administered 15 mg L-  
190 DOPA/3.75 mg carbidopa per kg of body weight and sacrificed after 15 minutes (point of maximal L-  
191 DOPA bioavailability in rats (18)). Plasma levels of L-DOPA and its metabolites dopamine and  
192 DOPAC were measured by HPLC-ED, while relative abundance of the tyrosine decarboxylase gene  
193 within the small intestinal microbiota was quantified by gene-specific qPCR (Fig. S5). Strikingly,  
194 Pearson *r* correlation analyses showed that the ratio between dopamine and L-DOPA levels in the  
195 proximal jejunal content positively correlated with tyrosine decarboxylase gene abundance ( $r= 0.78$ ,  
196  $R^2= 0.61$ ,  $P$  value = 0.0001) (Fig. 6A), whereas the absolute L-DOPA concentration in the proximal  
197 jejunal content was negatively correlated with the abundance of the gene ( $r= -0.68$ ,  $R^2= 0.46$ ,  $P$  value  
198 = 0.0021) (Fig. 6B). Moreover, plasma levels of L-DOPA displayed a strong negative correlation ( $r =$   
199  $-0.66$ ,  $R^2 = 0.434$ ,  $P$  value = 0.004) with the relative abundance of the tyrosine decarboxylase gene  
200 (Fig. 6C). Findings indicate L-DOPA uptake by the host is compromised by higher abundance of gut  
201 bacterial tyrosine decarboxylase genes in the upper region of the small intestine.

### 202 Discussion

203 Our observation of small intestinal microbiota able to convert L-DOPA to dopamine (Fig. 1) was the  
204 basis of investigating the role of L-DOPA metabolizing bacteria in the context of the disparity in  
205 effective long-established L-DOPA treatment between Parkinson's patients (Fig. 5) for which an  
206 appropriate explanation is lacking (19). This study identifies a novel factor to consider in both the  
207 evaluation and treatment efficacy of L-DOPA/carbidopa pharmacokinetics and pharmacodynamics.  
208 Our primary outcome is that L-DOPA decarboxylation by gut bacteria, particularly if found in higher  
209 abundances *in vivo* in the proximal small intestine, would drastically reduce the bioavailability of L-  
210 DOPA in the body, and thereby contribute to the observed higher dosages required in some patients.  
211 Previously, reduced L-DOPA availability has been associated with *Helicobacter pylori* positive  
212 Parkinson's patients, which was explained by the observation that *H. pylori* could bind L-DOPA *in*



213 *vitro* via surface adhesins (8). However, this explanation is valid only for small populations within the  
214 Parkinson's patients, who suffer from stomach ulcers and thus have high abundance of *H. pylori*.  
215 Parkinson's patients also often suffer from impaired small intestinal motility (20), and are frequently  
216 administered proton pump inhibitors (PPIs) (21), leading to small intestinal bacterial overgrowth (22,  
217 23). Members of Bacilli, including the genera *Enterococcus* and *Lactobacillus*, were previously  
218 identified as the predominant residents of the small intestine (24, 25), and in particular, *Enterococcus*  
219 has been reported to dominate in proton pump inhibitors' induced small intestinal bacterial overgrowth  
220 (26). These factors contribute to a higher abundance of tyrosine decarboxylase in the small intestinal  
221 microbiota, which would reduce the bioavailability of L-DOPA. Moreover, the corresponding rising  
222 levels of dopamine may further aggravate the reduced gut motility as previously shown (27), thereby  
223 enhancing a state of small intestinal bacterial overgrowth, and perpetuating a vicious circle leading to  
224 higher L-DOPA dosage requirement for effective treatment of individual Parkinson's patients (**Fig. 7**).  
225 Alternatively, prolonged L-DOPA administration may influence tyrosine decarboxylase-gene  
226 abundance by selectively stimulating tyrosine decarboxylase harboring bacteria in the gut. In fact, it  
227 has been shown that the fitness of *E. faecalis* v583 in low pH depends on the tyrosine decarboxylase-  
228 operon (14), indicating long-term exposure to L-DOPA could contribute to selection for overgrowth of  
229 tyrosine decarboxylase bacteria *in vivo* as supported by the positive correlation with disease duration  
230 and tyrosine decarboxylase-gene abundance (**Fig. 5B**). This would explain the fluctuating response to  
231 L-DOPA during prolonged disease treatment, and the consequent increased L-DOPA dosage regimen  
232 leading to increased severity of its adverse effects such as dyskinesia (28).

233 While our further investigation into the kinetics of both bacterial and human decarboxylases support  
234 the effectiveness of carbidopa to inhibit the human DOPA decarboxylase, it also shows that the same  
235 drug fails to inhibit L-DOPA bacterial tyrosine decarboxylase (**Fig. 4, S4**). This suggests a better  
236 equilibration of L-DOPA treatment between patients could potentially be achieved by co-  
237 administration of an effective inhibitor of bacterial tyrosine decarboxylase activity. To further explore  
238 this possibility, we are currently evaluating selectively suppressing growth and survival of tyrosine  
239 decarboxylase harboring bacteria *in situ* using antibiotic treatment targeted towards tyrosine  
240 decarboxylase inhibition. Alternatively, regulation of tyrosine decarboxylase gene expression, for

241 example by dietary intervention, could help avoid the need for high L-DOPA dosing, thus minimizing  
242 its adverse side effects.

243 Notably, specific strains of some of the bacterial species shown to encode and express tyrosine  
244 decarboxylases are marked as probiotics, implying that special care should be taken if certain subsets  
245 of the human population (e.g. Parkinson's patients) are given these probiotic supplementations.  
246 Collectively, L-DOPA conversion by bacterial tyrosine decarboxylase in the small intestine is a  
247 significant explanatory factor for the highly variable L-DOPA dosage regimens required in the  
248 treatment of individual Parkinson's patients. These bacteria or their encoded tyrosine decarboxylase  
249 gene may potentially serve as a predictive biomarker for patient stratification to predict the effective  
250 L-DOPA dosage regimens for Parkinson's patients on an individual basis. Such biomarker potential is  
251 supported by the significant and robust ( $r=0.70$ ) correlation observed between the relative abundance  
252 of tyrosine decarboxylase encoding bacterial genes and number of L-DOPA tablets required to treat  
253 individual Parkinson's patients (**Fig. 5A**).

254 A limitation of the present study is the relatively small number of patient fecal samples analyzed, and  
255 the lack of evidence as to whether high abundance of tyrosine decarboxylase *in vivo* is a cause and/or  
256 effect of higher L-DOPA dosage requirement during prolonged disease treatment. To overcome these  
257 limitations, a large longitudinal cohort of *de novo* Parkinson's patients should be designed and  
258 followed over long periods of time, with tyrosine decarboxylase gene abundance employed as a  
259 personal microbiota-based biomarker to predict individual L-DOPA dosage requirement.

## 260 **Material and Methods**

### 261 **Study design**

262 The study objective was to investigate the interference of small-intestine bacteria on the primary  
263 treatment of Parkinson's disease, L-DOPA. *In vitro* experiments were employed to determine the  
264 capacity of live bacteria from the proximal small intestine to decarboxylate L-DOPA. Further, to  
265 investigate whether natural variation of tyrosine decarboxylase relative abundance in the gut could  
266 interfere with L-DOPA uptake and decarboxylation, human fecal samples from Parkinson's patients  
267 on varying doses of L-DOPA/carbidopa, and jejunal content samples from rats on oral L-  
268 DOPA/carbidopa administration, were employed and tyrosine decarboxylase levels were detected in

269 an unblinded manner. L-DOPA and dopamine levels quantified from jejunal luminal content were  
270 normalized to carbidopa levels detected *in vivo* to correct for intake. All data were ranked from low to  
271 high by tyrosine decarboxylase level and linear regression was performed with automatic outlier  
272 detection using the ROUT method in Graphpad Prism 7. Two significant (Q=1%) outliers (an extreme  
273 low and high point) from the total group were removed. All animal procedures were approved by the  
274 Groningen University Committee of Animal experiments (approval number: AVD1050020184844),  
275 and were performed in adherence to the NIH Guide for the Care and Use of Laboratory Animals. All  
276 replicates and statistical methods are described in the figure legends.

### 277 **Bacterial growth conditions**

278 *Escherichia coli* DH5a or BL21 were routinely grown aerobically in Luria-Broth (LB) at 37°C degrees  
279 with continuous agitation. Other strains listed in **Table S5** were grown anaerobically (10% H<sub>2</sub>, 10%  
280 CO<sub>2</sub>, 80% N<sub>2</sub>) in a Don Whitley Scientific DG250 Workstation (LA Biosystems, Waalwijk, The  
281 Netherlands) at 37°C in an enriched beef broth based on SHIME medium (29) (**Table S6**). Bacteria  
282 were inoculated from -80°C stocks and grown overnight. Before the experiment, cultures were diluted  
283 1:100 in fresh medium from overnight cultures. L-DOPA (D9628, Sigma), carbidopa (C1335, Sigma),  
284 benserazide (B7283, Sigma), or methyldopa (857416, Sigma) were supplemented during the lag or  
285 stationary phase depending on the experiment. Growth was followed by measuring the optical density  
286 (OD) at 600 nm in a spectrophotometer (UV1600PC, VWR International, Leuven, Belgium).

### 287 **Cloning and heterologous expression**

288 The human DOPA decarboxylase was ordered in pET15b from GenScript (Piscataway, USA) (**Table**  
289 **S5**). Tyrosine decarboxylase-encoding genes from *E. faecalis* v583 (TDC<sub>EFS</sub>, accession: EOT87933),  
290 *E. faecium* W54 (TDC<sub>EFM</sub>, accession: MH358385; <sup>P</sup>TDC<sub>EFM</sub>, accession: MH358384) were amplified  
291 using Phusion High-fidelity DNA polymerase and primers listed in **Table S7**. All amplified genes  
292 were cloned in pET15b, resulting in pSK18, pSK11, and pSK22, respectively (**Table S7**). Plasmids  
293 were maintained in *E. coli* DH5α and verified by Sanger sequencing before transformation to *E. coli*  
294 BL21 (DE3). Overnight cultures were diluted 1:50 in fresh LB medium with the appropriate antibiotic  
295 and grown to OD<sub>600</sub> = 0.7-0.8. Protein translation was induced with 1mM Isopropyl β-D-1-  
296 thiogalactopyranoside (IPTG, 11411446001, Roche Diagnostics) and cultures were incubated

297 overnight at 18°C. Cells were washed with 1/5th of 1× ice-cold PBS and stored at −80 °C or directly  
298 used for protein isolation. Cell pellets were thawed on ice and resuspended in 1/50th of buffer A (300  
299 mM NaCl; 10 mM imidazole; 50 mM KPO<sub>4</sub>, pH 7.5) containing 0.2 mg/mL lysozyme (105281,  
300 Merck) and 2 µg/mL DNase (11284932001, Roche Diagnostics), and incubated for at least 10  
301 minutes on ice before sonication (10 cycles of 15s with 30s cooling at 8 microns amplitude) using  
302 Soniprep-150 plus (Beun de Ronde, Abcoude, The Netherlands). Cell debris were removed by  
303 centrifugation at 20000 × g for 20 min at 4°C. The 6×his-tagged proteins were purified using a nickel-  
304 nitrilotriacetic acid (Ni-NTA) agarose matrix (30250, Qiagen). Cell-free extracts were loaded on 0.5  
305 ml Ni-NTA matrixes and incubated on a roller shaker for 2 hours at 4°C. The Ni-NTA matrix was  
306 washed three times with 1.5 ml buffer B (300 mM NaCl; 20 mM imidazole; 50 mM KPO<sub>4</sub>, pH 7.5)  
307 before elution with buffer C (300 mM NaCl; 250 mM imidazole; 50 mM KPO<sub>4</sub>, pH 7.5). Imidazole  
308 was removed from purified protein fractions using Amicon Ultra centrifugal filters (UFC505024,  
309 Merck) and washed three times and reconstituted in buffer D (50 mM Tris-HCL; 300 mM NaCl; pH  
310 7.5) for TDC<sub>EFS</sub>, and TDC<sub>EFM</sub>, buffer E (100 mM KPO<sub>4</sub>; pH 7.4) for <sup>P</sup>TDC<sub>EFM</sub> and buffer F (100 mM  
311 KPO<sub>4</sub>; 0.1 mM pyridoxal-5-phosphate; pH 7.4) for DDC. Protein concentrations were measured  
312 spectrophotometrically (Nanodrop 2000, Isogen, De Meern, The Netherlands) using the predicted  
313 extinction coefficient and molecular weight from ExpASy ProtParam tool  
314 ([www.web.expasy.org/protparam/](http://www.web.expasy.org/protparam/)).

### 315 **Enzyme kinetics and IC<sub>50</sub> curves**

316 Enzyme kinetics were performed in 200 mM potassium acetate buffer at pH 5 for TDC<sub>EFS</sub> and  
317 TDC<sub>EFM</sub>, and pH 4.5 for <sup>P</sup>TDC<sub>EFM</sub> containing 0.1 mM PLP (pyridoxal-5-phosphate, P9255, Sigma) and  
318 10 nM of enzyme. Reactions were performed in triplicate using L-DOPA substrate ranges from 0.5-  
319 12.5 mM and tyrosine substrate ranges from 0.25-2.5 mM. Michaelis-Menten kinetic curves were  
320 fitted using GraphPad Prism 7. The human dopa decarboxylase kinetic reactions were performed in  
321 100 mM potassium phosphate buffer at pH 7.4 containing 0.1 mM PLP and 10 nM enzyme  
322 concentrations with L-DOPA substrate ranges from 0.1-1.0 mM. Reactions were stopped with 0.7%  
323 HClO<sub>4</sub>, filtered and analyzed on the HPLC-ED-system described below. For IC<sub>50</sub> curves, the reaction  
324 was performed using L-DOPA as the substrate at concentrations lower or equal to the K<sub>m</sub> (DDC, 0.1

325 mM; TDC<sub>EFS</sub> and TDC<sub>EFM</sub>, 1.0 mM; <sup>P</sup>TDC<sub>EFM</sub>, 0.5 mM) of the decarboxylases with 10 different  
326 concentrations of carbidopa in triplicate (human dopa decarboxylase, 0.005-2.56 μM; bacterial  
327 tyrosine decarboxylases, 2-1024 μM).

### 328 **HPLC-ED analysis and sample preparation**

329 1 mL of ice-cold methanol was added to 0.25 mL cell suspensions. Cells and protein precipitates were  
330 removed by centrifugation at 20000 × g for 10 min at 4°C. Supernatant was transferred to a new tube  
331 and the methanol fraction was evaporated in a Savant speed-vacuum dryer (SPD131, Fisher Scientific,  
332 Landsmeer, The Netherlands) at 60°C for 1h and 15 min. The aqueous fraction was reconstituted to 1  
333 mL with 0.7% HClO<sub>4</sub>. Samples were filtered and injected into the HPLC system (Jasco AS2059 plus  
334 autosampler, Jasco Benelux, Utrecht, The Netherlands; Knauer K-1001 pump, Separations, H. I.  
335 Ambacht, The Netherlands; Dionex ED40 electrochemical detector, Dionex, Sunnyvale, USA, with a  
336 glassy carbon working electrode (DC amperometry at 1.0 V or 0.8 V, with Ag/AgCl as reference  
337 electrode)). Samples were analyzed on a C18 column (Kinetex 5μM, C18 100 Å, 250 ×4.6 mm,  
338 Phenomenex, Utrecht, The Netherlands) using a gradient of water/methanol with 0.1% formic acid (0-  
339 10 min, 95–80% H<sub>2</sub>O; 10-20 min, 80-5% H<sub>2</sub>O; 20-23 min 5% H<sub>2</sub>O; 23-31 min 95% H<sub>2</sub>O). Data  
340 recording and analysis was performed using Chromeleon (version 6.8 SR13).

### 341 **Bioinformatics**

342 TDC<sub>EFS</sub> (NCBI accession: EOT87933) was BLASTed against the protein sequences from the NIH  
343 HMP using search limits for Entrez Query “43021[BioProject]”. All BLASTp hits were converted to a  
344 distance tree using NCBI TreeView (Parameters: Fast Minimum Evolution; Max Seq Difference, 0.9;  
345 Distance, Grishin). The tree was exported in Newick format and visualized in iTOL phylogentic  
346 display tool (<http://itol.embl.de/>). Whole genomes, or contigs containing the TDC gene cluster were  
347 extracted from NCBI and aligned using Mauve multiple genome alignment tool (v 2.4.0,  
348 [www.darlinglab.org/mauve/mauve.html](http://www.darlinglab.org/mauve/mauve.html)).

### 349 **Fecal samples from patients with Parkinson’s disease**

350 Fecal samples from patients diagnosed with Parkinson’s disease (n=10) on variable doses (300-  
351 1100mg L-DOPA per day) of L-DOPA/carbidopa treatment were acquired from the Movement  
352 Disorder Center at Rush University Medical Center, Chicago, Illinois, USA. Patients’ characteristics

353 were published previously (30) (more details are provided in Supplementary material). Solid fecal  
354 samples were collected in a fecal bag and kept sealed in a cold environment until brought to the  
355 hospital where they were immediately stored at  $-80^{\circ}\text{C}$  until analysis.

### 356 **Animal experiments**

357 Twenty-five male wild-type Groningen rats ((31); Groningen breed, male, age 18-24 weeks) living  
358 with 4-5 animals/cage had *ad libitum* access to water and food (RMH-B, AB Diets; Woerden, the  
359 Netherlands) in a temperature ( $21 \pm 1^{\circ}\text{C}$ ) and humidity-controlled room (45–60% relative humidity),  
360 with a 12 hr light/dark cycle (lights off at 13:00 p.m.). On ten occasions over a period of three weeks,  
361 rats were taken from their social housing cage between CT16 and CT16.5, and put in an individual  
362 training cage ( $L \times W \times H = 25 \times 25 \times 40$  cm) with a layer of their own sawdust without food and water.  
363 Ten minutes after transfer to these cages, rats were offered a drinking pipet in their cages with a 2.5 ml  
364 saccharine-solution (1.5 g/L, 12476, Sigma). Over the course of training, all rats learned to drink the  
365 saccharine-solution avidly. On the 11<sup>th</sup> occasion, the saccharine solution was used as vehicle for the L-  
366 DOPA/carbidopa mixture (15/3.75 mg/kg), which all rats drank within 15 seconds. Fifteen minutes  
367 after drinking the latter mixture (maximum bioavailability time point of L-DOPA in blood as  
368 previously described (18)), the rats were anesthetized with isoflurane and sacrificed. Blood was  
369 withdrawn by heart puncture and placed in tubes pre-coated with 5 mM EDTA. The collected blood  
370 samples were centrifuged at  $1500 \times g$  for 10 minutes at  $4^{\circ}\text{C}$  and the plasma was stored at  $-80^{\circ}\text{C}$  prior  
371 to L-DOPA, dopamine, and DOPAC extraction. Luminal contents were harvested from the jejunum by  
372 gentle pressing and were snap frozen in liquid  $\text{N}_2$ , stored at  $-80^{\circ}\text{C}$  until used for qPCR, and extracted  
373 of L-DOPA and its metabolites. Oral administration (drinking) of L-DOPA was corrected for by using  
374 carbidopa as an internal standard. Further, 5 rats were administered a saccharine only solution  
375 (vehicle) to check for basal levels of L-DOPA, dopamine, and DOPAC levels or background HPLC-  
376 peaks, and were also employed in jejunal content *ex vivo* incubations.

### 377 **Incubation experiments of jejunal content**

378 Luminal contents from the jejunum of wild-type Groningen rats ( $n=5$ ) (see animal experiment above)  
379 were suspended in EBB (5% w/v) containing 1 mM L-DOPA and incubated for 24 hours in an  
380 anaerobic chamber at  $37^{\circ}\text{C}$  prior to HPLC-ED analysis (DC amperometry at 0.8 V).

381 **DNA extraction**

382 DNA was extracted from fecal samples of Parkinson's patients and jejunal contents of rats using  
383 QIAGEN (Cat no. 51504) kit-based DNA isolation as previously described (32) with the following  
384 modifications: fecal samples were suspended in 1 mL inhibitEX buffer (1:5 w/v) and transferred to  
385 screw-caped tubes containing 0.5 g 0.1 mm glass beads and three 3 mm glass beads. Samples were  
386 homogenized  $3 \times 30$  sec with 1-minute intervals on ice in a mini bead-beater (Biospec, Bartlesville,  
387 USA) 3 times.

388 **Quantification of bacterial tyrosine decarboxylase**

389 To cover all potential bacterial species carrying the tyrosine decarboxylase gene, a broad range of  
390 tyrosine decarboxylase genes from various bacterial genera were targeted as previously described (33)  
391 (**Fig. S5**). Quantitative PCR (qPCR) of tyrosine decarboxylase genes was performed on DNA  
392 extracted from each fecal sample of Parkinson's patients and rats' jejunal content using primers  
393 targeting a 350bp region of the tyrosine decarboxylase gene (Dec5f and Dec3r). Primers targeting  
394 16sRNA gene for all bacteria (Eub338 and Eub518) were used as an internal control (**Table S7**). All  
395 qPCR experiments were performed in a Bio-Rad CFX96 RT-PCR system (Bio-Rad Laboratories,  
396 Veenendaal, The Netherlands) with iQ SYBR Green Supermix (170-8882, Bio-Rad) in triplicate on 20  
397 ng DNA in 10 uL reactions using the manufacturer's protocol. qPCR was performed using the  
398 following parameters: 3 min at 95°C; 15 sec at 95°C, 1 min at 58°C, 40 cycles. A melting curve was  
399 determined at the end of each run to verify the specificity of the PCR amplicons. Data analysis was  
400 performed using the BioRad software. Ct[DEC] values were corrected with the internal control  
401 (Ct[16s]) and linearized using  $2^{-(Ct[DEC]-Ct[16s])}$  based on the  $2^{-\Delta\Delta Ct}$  method (34).

402 **Jejunal and plasma extraction of L-DOPA and its metabolites**

403 L-DOPA, dopamine, and DOPAC were extracted from each luminal content of jejunal and plasma  
404 samples of rats using activated alumina powder (199966, Sigma) as previously described (35) with a  
405 few modifications. 50-200  $\mu$ l blood plasma was used with 50-200  $\mu$ L 1 $\mu$ M DHBA (3, 4-  
406 dihydroxybenzylamine hydrobromide, 858781, Sigma) as an internal standard. For jejunal luminal  
407 content samples, an equal amount of water was added (w/v), and suspensions were vigorously mixed



408 using a vortex. Suspensions were subsequently centrifuged at  $20000 \times g$  for 10 min at  $4^{\circ}\text{C}$ . 50-200  $\mu\text{L}$   
409 supernatant was used for extraction. Samples were adjusted to pH 8.6 with 200–800 $\mu\text{l}$  TE buffer  
410 (2.5% EDTA; 1.5 M Tris/HCl pH 8.6) and 5-10 mg of alumina was added. Tubes were mixed on a  
411 roller shaker at room temperature for 15 min and were thereafter centrifuged for 30s at  $20000 \times g$  and  
412 washed twice with 1 mL of  $\text{H}_2\text{O}$  by aspiration. L-DOPA and its metabolites were eluted using 0.7%  
413  $\text{HClO}_4$  and filtered before injection into the HPLC-ED-system as described above (DC amperometry at  
414 0.8 V).

#### 415 **Statistics and (non)linear regression models**

416 All statistical tests and (non)linear regression models were performed using GraphPad Prism 7.  
417 Statistical tests performed are unpaired T-tests, 2-way-ANOVA followed by a Fisher's LSD test.  
418 Specific tests and significance are indicated in the figure legends.

#### 419 **Supplementary Materials**

##### 420 Material and Methods

421 Fig S1. Higher L-DOPA plasma levels in germ-free mice compared to specific pathogen-free mice.

422 Fig S2. Microbiota harboring other PLP-dependent amino acid decarboxylases do not decarboxylate  
423 L-DOPA.

424 Fig S3. IC<sub>50</sub> determination for human DOPA decarboxylase and bacterial tyrosine decarboxylases.

425 Fig S4. Human DOPA decarboxylase inhibitors are ineffective against the decarboxylase activity of  
426 live Enterococci.

427 Fig S5. Primers (Dec5f and Dec3r) targeting *Enterococcus faecalis* v583 tyrosine decarboxylase gene.

428 Table S1. Healthy and clinical isolates of *Enterococcus* species.

429 Table S2. List of microbiota harboring other PLP-dependent amino acid decarboxylases tested in this  
430 study.

431 Table S3. IC<sub>50</sub> curve parameters.

432 Table S4. Sample information, Parkinson's patients.

433 Table S5. Bacterial strains and plasmids used in this study.

434 Table S6. Constituents of enriched beef broth (EBB) medium used in this study.

435 Table S7. Primer sequences used in this study.

436 Data file S1. Identification of conserved tyrosine decarboxylase paralogue protein (<sup>P</sup>TDC<sub>EFM</sub>) in all *E.*  
437 *faecium* strains analyzed.

438

## 439 References

- 440 1. C. T. Kahrstrom, N. Pariente, U. Weiss, Intestinal microbiota in health and disease. *Nature*  
441 **535**, 47 (2016).
- 442 2. J. M. Yano, K. Yu, G. P. Donaldson, G. G. Shastri, P. Ann, L. Ma, C. R. Nagler, R. F. Ismagilov, S.  
443 K. Mazmanian, E. Y. Hsiao, Indigenous bacteria from the gut microbiota regulate host  
444 serotonin biosynthesis. *Cell* **161**, 264-276 (2015).
- 445 3. K. Mao, A. P. Baptista, S. Tamoutounour, L. Zhuang, N. Bouladoux, A. J. Martins, Y. Huang, M.  
446 Y. Gerner, Y. Belkaid, R. N. Germain, Innate and adaptive lymphocytes sequentially shape the  
447 gut microbiota and lipid metabolism. *Nature* **554**, 255-259 (2018).
- 448 4. M. M. Pusceddu, S. El Aidy, F. Crispie, O. O'Sullivan, P. Cotter, C. Stanton, P. Kelly, J. F. Cryan,  
449 T. G. Dinan, N-3 Polyunsaturated Fatty Acids (PUFAs) Reverse the Impact of Early-Life Stress  
450 on the Gut Microbiota. *PLoS one* **10**, e0139721 (2015).
- 451 5. S. El Aidy, P. van Baarlen, M. Derrien, D. J. Lindenbergh-Kortleve, G. Hooiveld, F. Levenez, J.  
452 Dore, J. Dekker, J. N. Samsom, E. E. Nieuwenhuis, M. Kleerebezem, Temporal and spatial  
453 interplay of microbiota and intestinal mucosa drive establishment of immune homeostasis in  
454 conventionalized mice. *Mucosal Immunol* **5**, 567-579 (2012).
- 455 6. J. R. Kelly, Y. Borre, O. B. C. E. Patterson, S. El Aidy, J. Deane, P. J. Kennedy, S. Beers, K. Scott,  
456 G. Moloney, A. E. Hoban, L. Scott, P. Fitzgerald, P. Ross, C. Stanton, G. Clarke, J. F. Cryan, T. G.  
457 Dinan, Transferring the blues: Depression-associated gut microbiota induces  
458 neurobehavioural changes in the rat. *Journal of psychiatric research* **82**, 109-118 (2016).
- 459 7. E. F. Enright, C. G. Gahan, S. A. Joyce, B. T. Griffin, The Impact of the Gut Microbiota on Drug  
460 Metabolism and Clinical Outcome. *The Yale journal of biology and medicine* **89**, 375-382  
461 (2016).
- 462 8. M. Niehues, A. Hensel, In-vitro interaction of L-dopa with bacterial adhesins of *Helicobacter*  
463 *pylori*: an explanation for clinical differences in bioavailability? *The Journal of pharmacy and*  
464 *pharmacology* **61**, 1303-1307 (2009).
- 465 9. P. A. B. Pereira, V. T. E. Aho, L. Paulin, E. Pekkonen, P. Auvinen, F. Scheperjans, Oral and nasal  
466 microbiota in Parkinson's disease. *Parkinsonism & related disorders* **38**, 61-67 (2017).
- 467 10. T. R. Sampson, J. W. Debelius, T. Thron, S. Janssen, G. G. Shastri, Z. E. Ilhan, C. Challis, C. E.  
468 Schretter, S. Rocha, V. Gradinaru, M. F. Chesselet, A. Keshavarzian, K. M. Shannon, R.  
469 Krajmalnik-Brown, P. Wittung-Stafshede, R. Knight, S. K. Mazmanian, Gut Microbiota  
470 Regulate Motor Deficits and Neuroinflammation in a Model of Parkinson's Disease. *Cell* **167**,  
471 1469-1480.e1412 (2016).
- 472 11. F. Scheperjans, P. A. B. Aho V Fau - Pereira, K. Pereira Pa Fau - Koskinen, L. Koskinen K Fau -  
473 Paulin, E. Paulin L Fau - Pekkonen, E. Pekkonen E Fau - Haapaniemi, S. Haapaniemi E Fau -  
474 Kaakkola, J. Kaakkola S Fau - Eerola-Rautio, M. Eerola-Rautio J Fau - Pohja, E. Pohja M Fau -  
475 Kinnunen, K. Kinnunen E Fau - Murros, P. Murros K Fau - Auvinen, P. Auvinen, Gut microbiota  
476 are related to Parkinson's disease and clinical phenotype.
- 477 12. F. Scheperjans, V. Aho, P. A. Pereira, K. Koskinen, L. Paulin, E. Pekkonen, E. Haapaniemi, S.  
478 Kaakkola, J. Eerola-Rautio, M. Pohja, E. Kinnunen, K. Murros, P. Auvinen, Gut microbiota are  
479 related to Parkinson's disease and clinical phenotype. *Movement disorders : official journal of*  
480 *the Movement Disorder Society* **30**, 350-358 (2015).
- 481 13. R. Katzenschlager, A. J. Lees, Treatment of Parkinson's disease: levodopa as the first choice.  
482 *Journal of neurology* **249 Suppl 2**, ii19-24 (2002).

- 483 14. M. Perez, M. Calles-Enriquez, I. Nes, M. C. Martin, M. Fernandez, V. Ladero, M. A. Alvarez,  
484 Tyramine biosynthesis is transcriptionally induced at low pH and improves the fitness of  
485 *Enterococcus faecalis* in acidic environments. *Applied microbiology and biotechnology* **99**,  
486 3547-3558 (2015).
- 487 15. H. Zhu, G. Xu, K. Zhang, X. Kong, R. Han, J. Zhou, Y. Ni, Crystal structure of tyrosine  
488 decarboxylase and identification of key residues involved in conformational swing and  
489 substrate binding. *Scientific reports* **6**, 27779 (2016).
- 490 16. K. Zhang, Y. Ni, Tyrosine decarboxylase from *Lactobacillus brevis*: soluble expression and  
491 characterization. *Protein expression and purification* **94**, 33-39 (2014).
- 492 17. B. B. Williams, A. H. Van Benschoten, P. Cimermancic, M. S. Donia, M. Zimmermann, M.  
493 Taketani, A. Ishihara, P. C. Kashyap, J. S. Fraser, M. A. Fischbach, Discovery and  
494 characterization of gut microbiota decarboxylases that can produce the neurotransmitter  
495 tryptamine. *Cell host & microbe* **16**, 495-503 (2014).
- 496 18. E. Bredberg, H. Lennernäs, L. Paalzow, Pharmacokinetics of Levodopa and Carbidopa in Rats  
497 Following Different Routes of Administration. *Pharmaceutical Research* **11**, 549-555 (1994).
- 498 19. C. L. Tomlinson, R. Stowe, S. Patel, C. Rick, R. Gray, C. E. Clarke, Systematic review of  
499 levodopa dose equivalency reporting in Parkinson's disease. *Movement disorders : official*  
500 *journal of the Movement Disorder Society* **25**, 2649-2653 (2010).
- 501 20. C. Pellegrini, L. Antonioli, R. Colucci, V. Ballabeni, E. Barocelli, N. Bernardini, C. Blandizzi, M.  
502 Fornai, Gastric motor dysfunctions in Parkinson's disease: Current pre-clinical evidence.  
503 *Parkinsonism & related disorders* **21**, 1407-1414 (2015).
- 504 21. J. E. Richter, The many manifestations of gastroesophageal reflux disease: presentation,  
505 evaluation, and treatment. *Gastroenterology clinics of North America* **36**, 577-599, viii-ix  
506 (2007).
- 507 22. A. H. Tan, S. Mahadeva, A. M. Thalha, P. R. Gibson, C. K. Kiew, C. M. Yeat, S. W. Ng, S. P. Ang,  
508 S. K. Chow, C. T. Tan, H. S. Yong, C. Marras, S. H. Fox, S. Y. Lim, Small intestinal bacterial  
509 overgrowth in Parkinson's disease. *Parkinsonism & related disorders* **20**, 535-540 (2014).
- 510 23. R. Pfeiffer, Beyond here be dragons: SIBO in Parkinson's disease. *Movement disorders :*  
511 *official journal of the Movement Disorder Society* **28**, 1764-1765 (2013).
- 512 24. E. G. Zoetendal, J. Raes, B. van den Bogert, M. Arumugam, C. C. Booiijink, F. J. Troost, P. Bork,  
513 M. Wels, W. M. de Vos, M. Kleerebezem, The human small intestinal microbiota is driven by  
514 rapid uptake and conversion of simple carbohydrates. *The ISME journal* **6**, 1415-1426 (2012).
- 515 25. S. El Aidy, B. van den Bogert, M. Kleerebezem, The small intestine microbiota, nutritional  
516 modulation and relevance for health. *Curr Opin Biotechnol* **32c**, 14-20 (2014).
- 517 26. D. E. Freedberg, N. C. Toussaint, S. P. Chen, A. J. Ratner, S. Whittier, T. C. Wang, H. H. Wang,  
518 J. A. Abrams, Proton Pump Inhibitors Alter Specific Taxa in the Human Gastrointestinal  
519 Microbiome: A Crossover Trial. *Gastroenterology* **149**, 883-885.e889 (2015).
- 520 27. J. E. Valenzuela, C. P. Dooley, Dopamine antagonists in the upper gastrointestinal tract.  
521 *Scandinavian journal of gastroenterology. Supplement* **96**, 127-136 (1984).
- 522 28. P. A. Kempster, D. R. Williams, M. Selikhova, J. Holton, T. Revesz, A. J. Lees, Patterns of  
523 levodopa response in Parkinson's disease: a clinico-pathological study. *Brain* **130**, 2123-2128  
524 (2007).
- 525 29. J. M. Auchtung, C. D. Robinson, R. A. Britton, Cultivation of stable, reproducible microbial  
526 communities from different fecal donors using minibioreactor arrays (MBRAs). *Microbiome* **3**,  
527 42 (2015).
- 528 30. A. Keshavarzian, S. J. Green, P. A. Engen, R. M. Voigt, A. Naqib, C. B. Forsyth, E. Mutlu, K. M.  
529 Shannon, Colonic bacterial composition in Parkinson's disease. *Movement disorders : official*  
530 *journal of the Movement Disorder Society* **30**, 1351-1360 (2015).
- 531 31. J. M. Koolhaas, C. M. Coppens, S. F. de Boer, B. Buwalda, P. Meerlo, P. J. A. Timmermans, The  
532 Resident-intruder Paradigm: A Standardized Test for Aggression, Violence and Social Stress.  
533 *Journal of Visualized Experiments : JoVE*, 4367 (2013).

- 534 32. E. G. Zoetendal, H. G. Heilig, E. S. Klaassens, C. C. Booiijk, M. Kleerebezem, H. Smidt, W. M.  
535 de Vos, Isolation of DNA from bacterial samples of the human gastrointestinal tract. *Nature*  
536 *protocols* **1**, 870-873 (2006).
- 537 33. S. Torriani, V. Gatto, S. Sembeni, R. Tofalo, G. Suzzi, N. Belletti, F. Gardini, S. Bover-Cid, Rapid  
538 detection and quantification of tyrosine decarboxylase gene (tdc) and its expression in gram-  
539 positive bacteria associated with fermented foods using PCR-based methods. *Journal of food*  
540 *protection* **71**, 93-101 (2008).
- 541 34. K. J. Livak, T. D. Schmittgen, Analysis of relative gene expression data using real-time  
542 quantitative PCR and the 2(-Delta Delta C(T)) Method. *Methods (San Diego, Calif.)* **25**, 402-  
543 408 (2001).
- 544 35. M. F. Ganhao, J. Hattingh, M. L. Hurwitz, N. I. Pitts, Evaluation of a simple plasma  
545 catecholamine extraction procedure prior to high-performance liquid chromatography and  
546 electrochemical detection. *Journal of chromatography* **564**, 55-66 (1991).

547

## 548 **Acknowledgements**

549 We thank Dr. Saskia van Hemert and Dr. Coline Gerritsen of Winclove Probiotics, Amsterdam,  
550 Netherlands, for providing us *E.faecium* W54 and *L.brevis* W63, as well as their sequencing data; Dr.  
551 Jan Kok of Department of Molecular genetics, University of Groningen, Netherlands, and Dr. Miguel  
552 A. Alvarez of Instituto de Productos Lácteos de Asturias, Villaviciosa, Spain for providing the mutant  
553 strain *E. faecalis* v583; Dr. Uwe Tietge and Rema H. Mistry, MSc. of the Department of Pediatrics,  
554 University Medical Centre Groningen, Groningen, Netherlands for providing assistance with germ-  
555 free and specific pathogen free mice; and Dr. Phillip A. Engen, Division of Digestive Disease and  
556 Nutrition, Section of Gastroenterology, Rush University Medical Center, USA for assisting in  
557 preparing fecal specimen from Parkinson's patients for shipment.

558 **Funding:** SEA is supported by a Rosalind Franklin Fellowship, co-funded by the European Union and  
559 University of Groningen, The Netherlands.

560 **Authors Contributions:** S.P.K. and S.E.A conceived and designed the study. S.P.K, A.K.F.,  
561 A.O.E.G., M.C., A.K., G.D., S.E.A performed the experiments and S.P.K and S.E.A analyzed the data.  
562 S.P.K and S.E.A. wrote the original manuscript that was reviewed by A.K.F., S.E.A., A.K., G.D.  
563 Funding was acquired by S.E.A.

564 **Conflict of interest:** The authors declare no conflicts of interest.

565

566

567

568 **Figures, Tables, and legends**

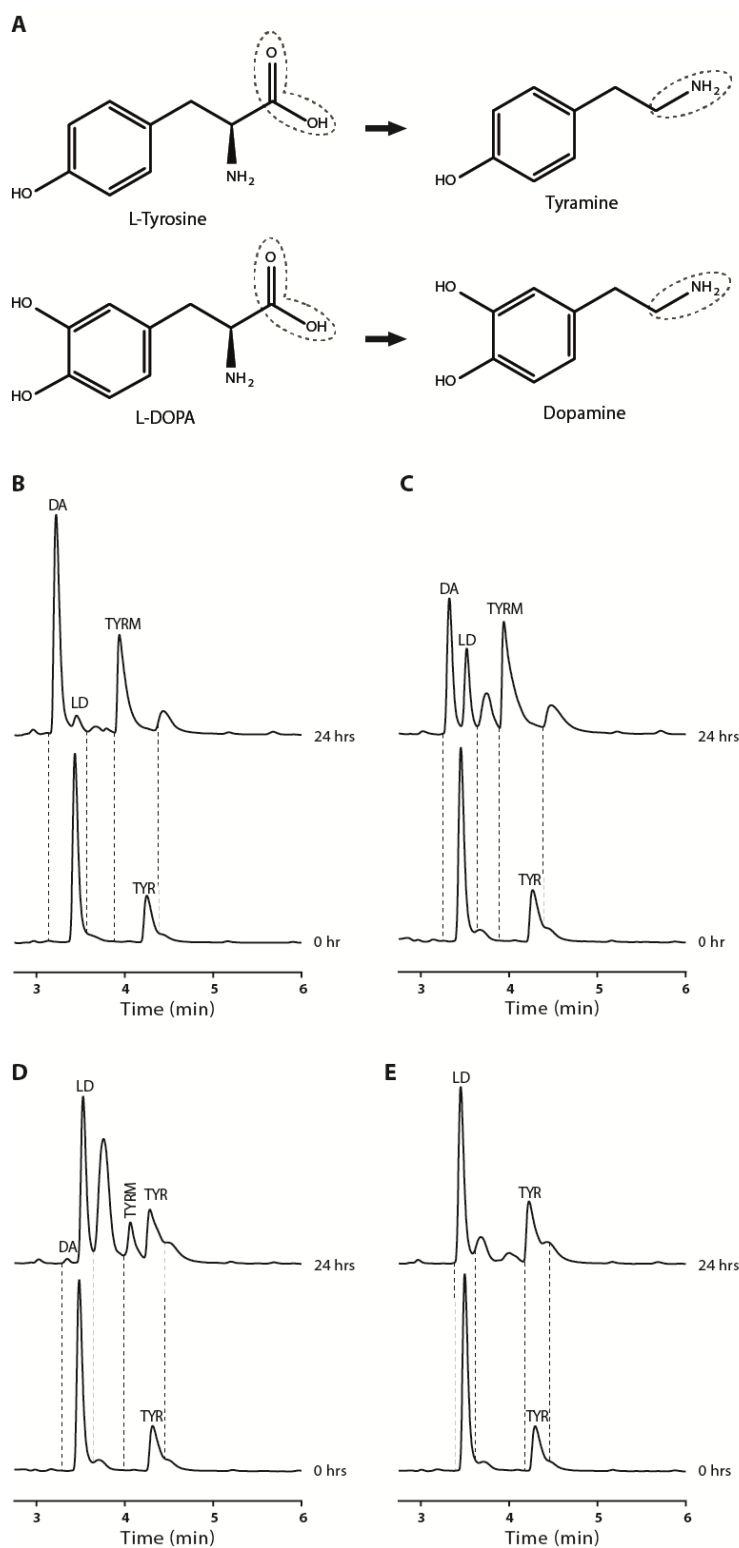

569

570 **Fig. 1. Jejunal bacteria decarboxylate L-DOPA to dopamine in alignment with their production**

571 **of tyramine *ex vivo*.** (A) Decarboxylation reaction for tyrosine and L-DOPA. (B, C) Bacterial

572 conversion of tyrosine (TYR) to tyramine (TYRM) and 1 mM of supplemented L-DOPA (LD) to

573 dopamine (DA), during 24 hrs of incubation. **(D)** Detection of low amounts of dopamine production  
574 when tyrosine was still abundant and tyramine production was relatively low. **(E)** No tyrosine was  
575 converted to tyramine, accordingly no L-DOPA was converted to dopamine.

**A**

**TDC**

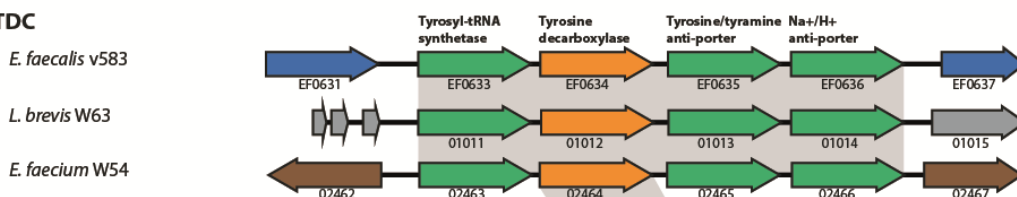

**<sup>P</sup>TDC<sub>EFM</sub>**

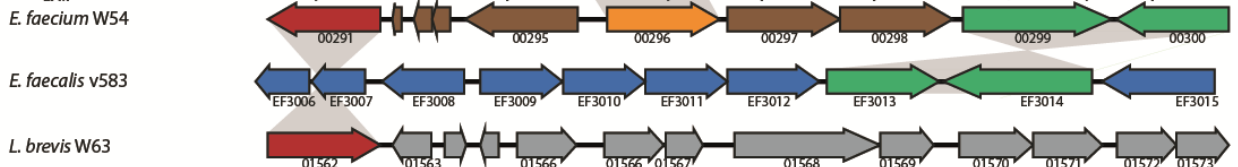

**B**

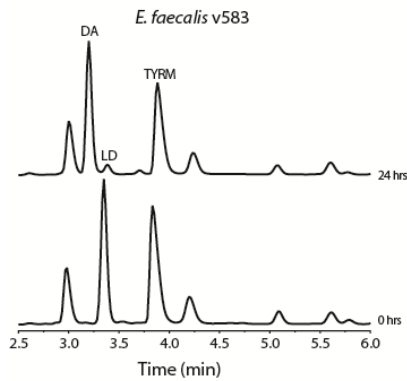

**C**

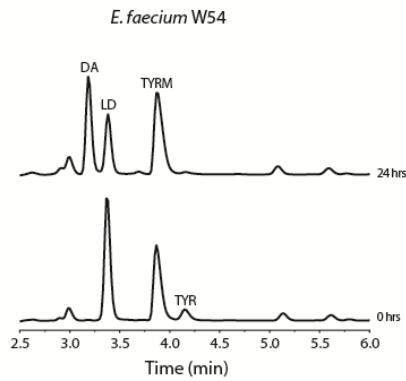

**D**

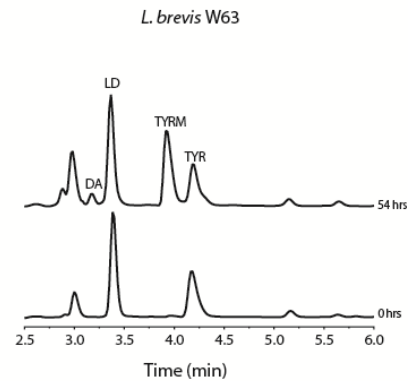

**E**

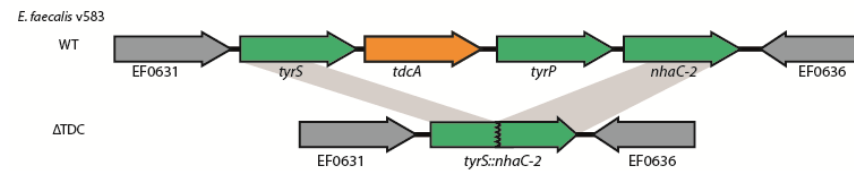

**F**

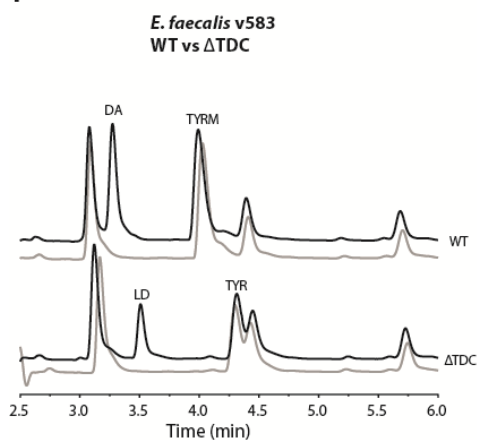

**G**

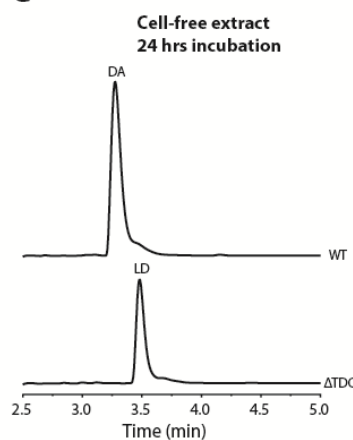

576  
577

**Fig. 2. Gut bacteria harboring tyrosine decarboxylases are responsible for L-DOPA**

578 **decarboxylation.** (A) Aligned genomes of *E. faecium*, *E. faecalis*, and *L. brevis*. The conserved *tdc-*



579 operon is depicted with *tdc*-gene in orange. Overnight cultures of **(B)** *E. faecalis* v583, **(C)** *E. faecium*  
580 W54, and **(D)** *L. brevis* W63 incubated anaerobically at 37 °C with 100 µM of L-DOPA (LD). **(E)**  
581 Genomic scheme showing the differences between EFS<sup>WT</sup> (this study) and EFS<sup>ΔTDC</sup>(14). **(F)**  
582 Overnight cultures of EFS<sup>WT</sup> and EFS<sup>ΔTDC</sup> incubated anaerobically at 37 °C with 100 uM L-DOPA  
583 (black line) compared to control (grey line) where no L-DOPA was added. **(G)** Comparison of enzyme  
584 activity of EFS<sup>WT</sup> and EFS<sup>ΔTDC</sup> cell-free protein extracts after O/N incubation with 1 mM L-DOPA at  
585 37 °C. Curves represent 3 biological replicates.

586

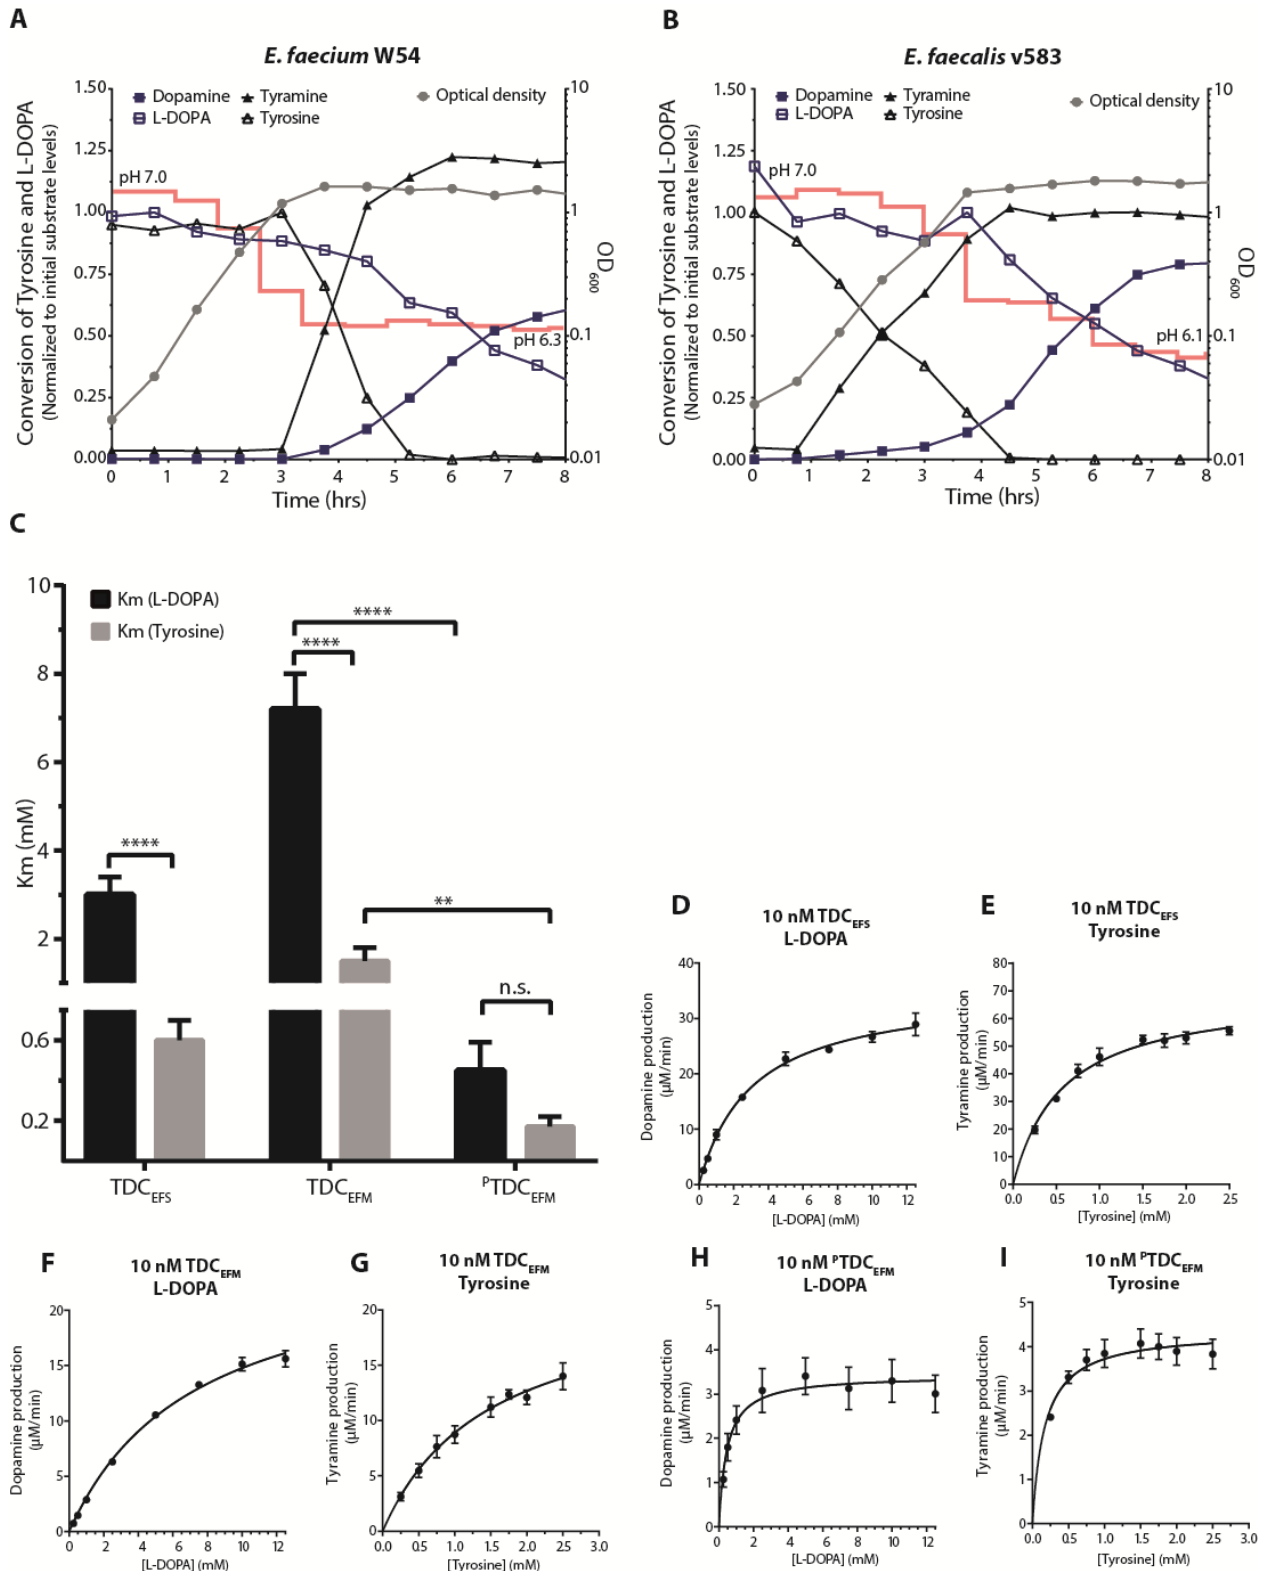

587 **Fig. 3. Enterococci decarboxylate L-DOPA in presence of tyrosine despite higher affinity for**  
 588

589 **tyrosine *in vitro*.** Growth curve (grey circle, right Y-axis) of *E. faecium* W54 (A) and *E. faecalis* (B)

590 plotted together with L-DOPA (open square), dopamine (closed square), tyrosine (open triangle), and

591 tyramine (closed triangle) levels (left Y-axis). Concentrations of product and substrate were

592 normalized to the initial levels of the corresponding substrate. pH of the culture is indicated over time  
593 as a red line. (C) Substrate affinity (Km) for L-DOPA and tyrosine for purified tyrosine  
594 decarboxylases from *E. faecalis* v583 (TDC<sub>EFS</sub>), *E. faecium* W54 (TDC<sub>EFM</sub>, <sup>P</sup>TDC<sub>EFM</sub>). (D-I)  
595 Michaelis-Menten kinetic curves for L-DOPA and tyrosine as substrate for TDC<sub>EFS</sub> (D,E), TDC<sub>EFM</sub>  
596 (F,G), and <sup>P</sup>TDC<sub>EFM</sub> (H,I). Reactions were performed in triplicate using L-DOPA concentrations  
597 ranging from 0.5-12.5 mM and tyrosine concentrations ranging from 0.25-2.5 mM. The enzyme  
598 kinetic parameters were calculated using nonlinear Michaelis-Menten nonlinear regression model.  
599 Significance was tested using 2-way-Anova, Fisher LSD test, (\*=p<0.02 \*\*=p<0.01 \*\*\*\*<0.0001).

600

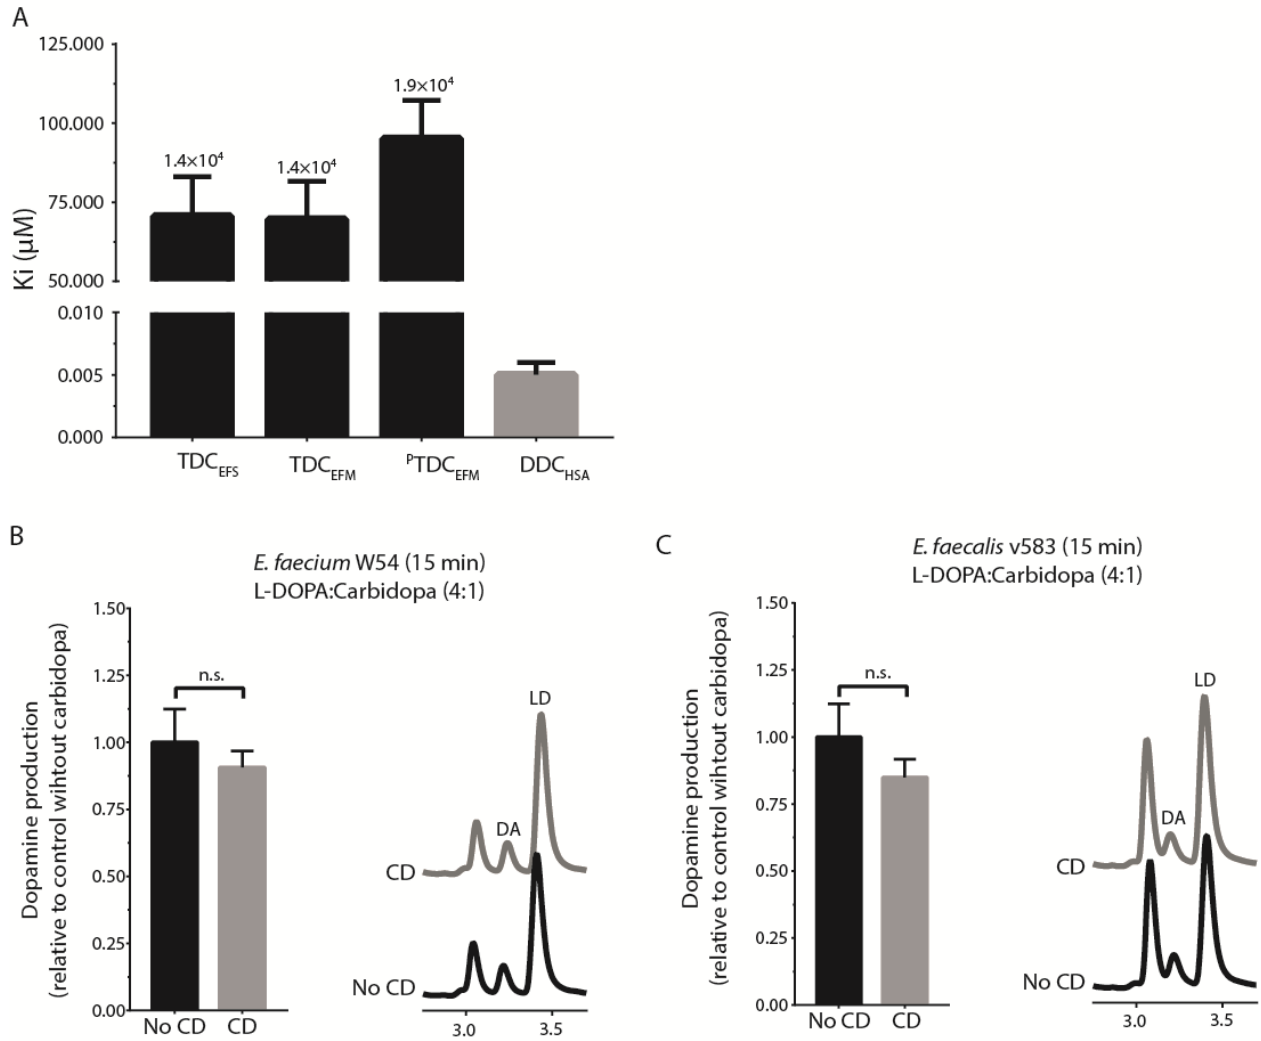

601

602 **Fig. 4. Human DOPA decarboxylase inhibitor, carbidopa, does not inhibit bacterial**

603 **decarboxylation.** (A) Inhibitory constants ( $K_i$ ) of bacterial decarboxylases (black) and human DOPA

604 decarboxylase (grey), with fold-difference between bacterial and human decarboxylase displayed on

605 top of the bars. Quantitative comparison of dopamine (DA) production by *E. faecium* W54, (B) and *E.*

606 *faecalis* v583, (C) at stationary phase after 15 min, with representative HPLC-ED curve. Bacterial

607 cultures ( $n=3$ ) were incubated with 100  $\mu\text{M}$  L-DOPA (LD) or a 4:1 mixture (in weight) of L-DOPA

608 and carbidopa (CD) (100  $\mu\text{M}$  L-DOPA and 21.7  $\mu\text{M}$  carbidopa). Significance was tested using a

609 parametric unpaired T-test.

610

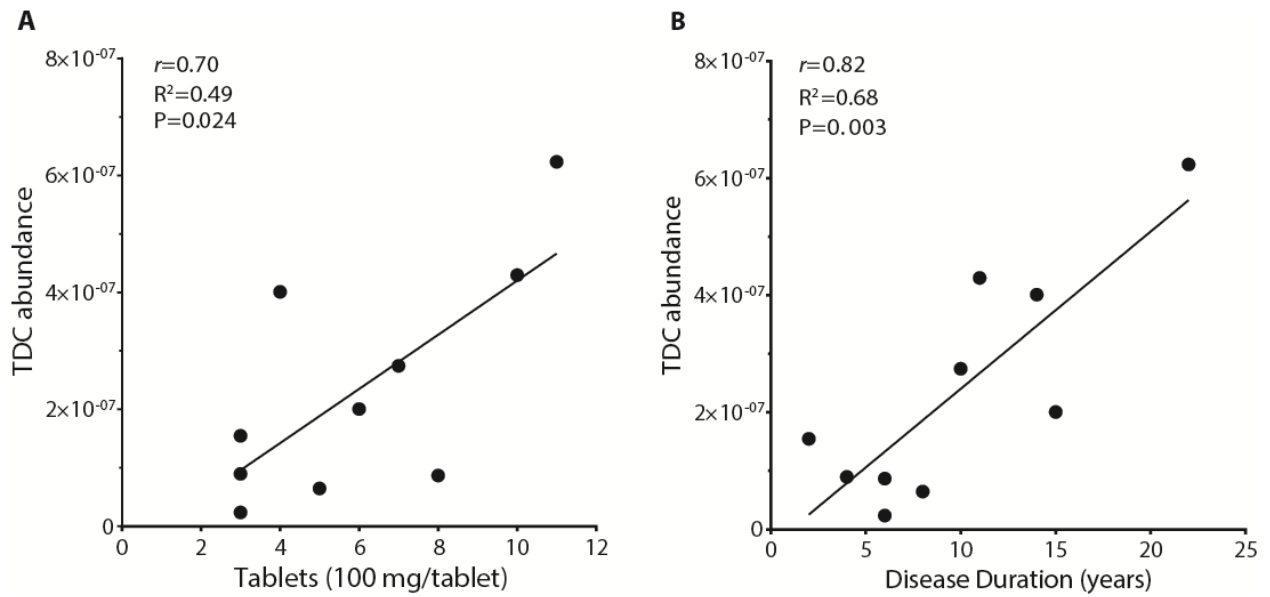

611

612 **Fig. 5. Tyrosine decarboxylase gene abundance correlates with daily L-DOPA dose and disease**

613 **duration in fecal samples of Parkinson's patients. (A)** Scatter plot of tyrosine decarboxylase

614 (TDC)-gene abundance measured by qPCR in fecal samples of Parkinson's patients (n=10) versus

615 daily L-DOPA dosage fitted with linear regression model. **(B)** Scatter plot of TDC gene abundance

616 from the same samples versus disease duration fitted with a linear regression model. Pearson's *r*

617 analysis was used to determine significant correlations between tyrosine decarboxylase -gene

618 abundance and dosage ( $r=0.70$ ,  $R^2=0.49$ ,  $P$  value=0.024) or disease duration ( $r = 0.82$ ,  $R^2 = 0.68$ ,  $P$

619 value = 0.003).

620

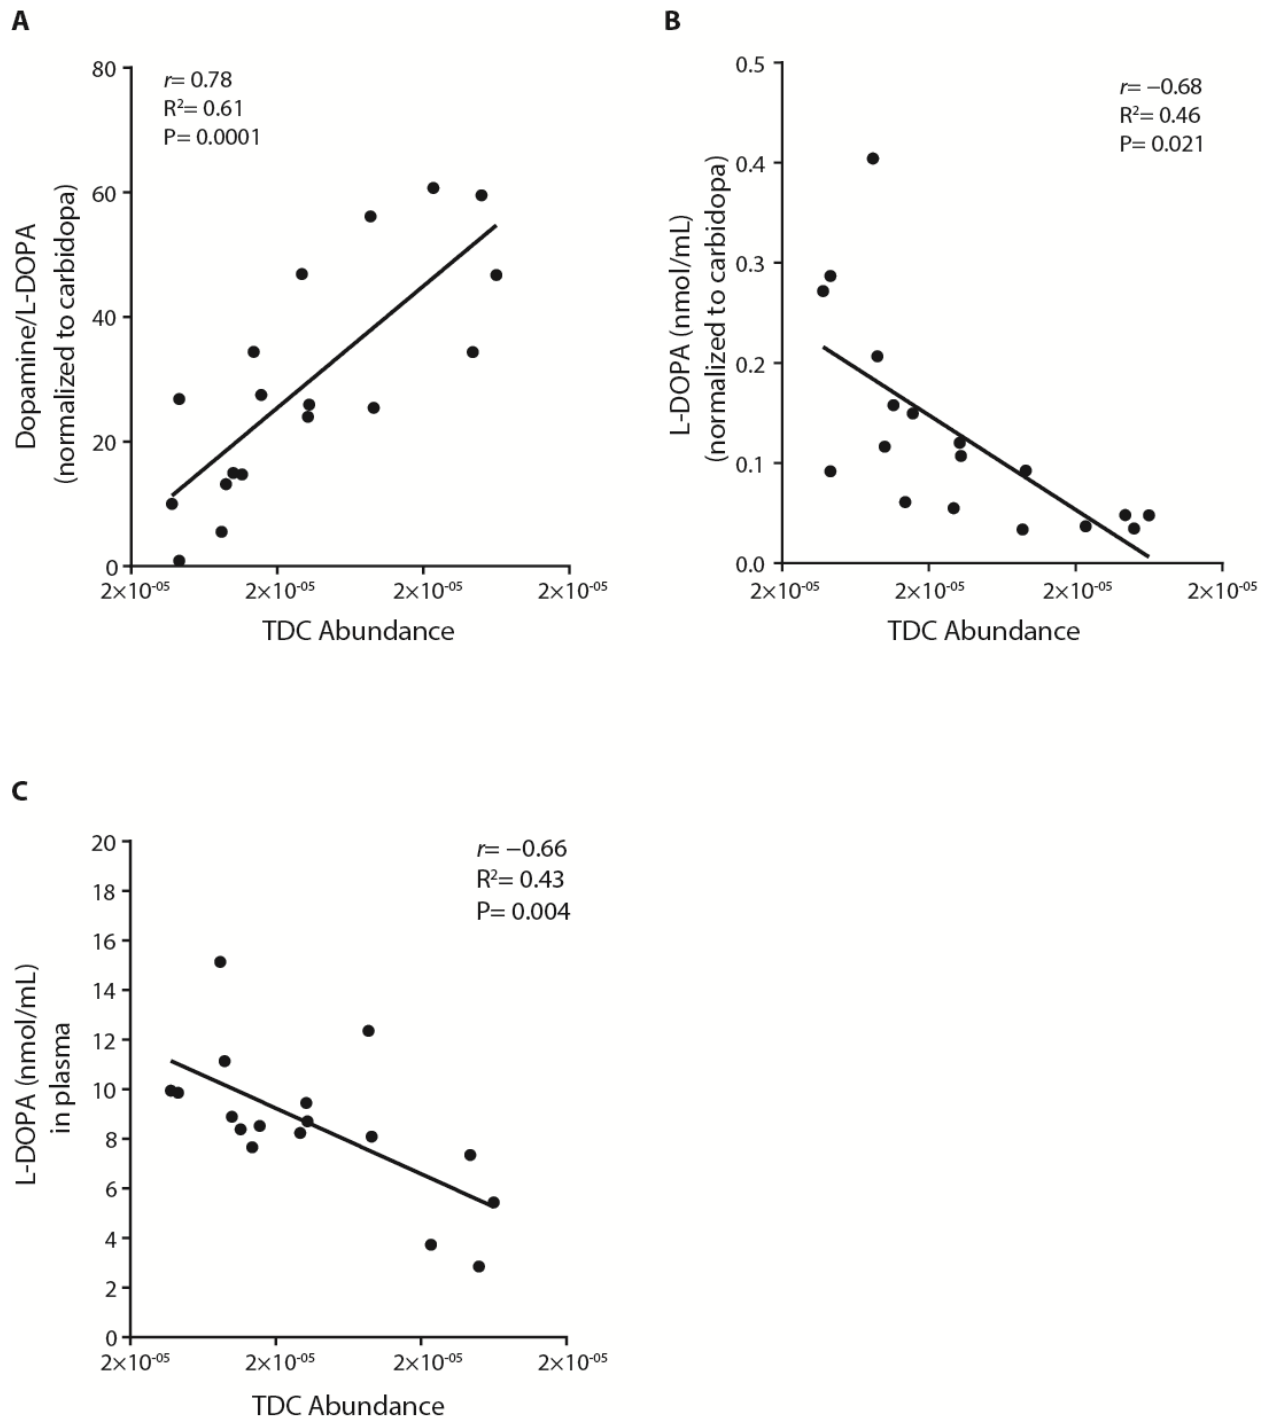

621

622 **Fig. 6. Tyrosine decarboxylase gene abundance correlates with L-DOPA bioavailability in rats.**

623 Scatter plot of tyrosine decarboxylase (TDC)-gene abundance measured by qPCR in jejunal content of

624 wild-type Groningen rats (n=18) orally supplied with a L-DOPA/carbidopa mixture (4:1) versus (A)

625 the dopamine/L-DOPA levels in the jejunal content, (B) the L-DOPA levels in the jejunal content, (C)

626 or the L-DOPA levels in the plasma, fitted with a linear regression model. Pearson's  $r$  correlation was

627 used to determine significant correlations between TDC-gene abundance and jejunal dopamine levels

628 (r = 0.78, R<sup>2</sup> = 0.61, *P* value = 0.0001), jejunal L-DOPA levels (r = -0.68, R<sup>2</sup> = 0.46 *P* value = 0.021),  
629 or plasma L-DOPA levels (r = -0.66, R<sup>2</sup> = 0.43, *P* value = 0.004).

630



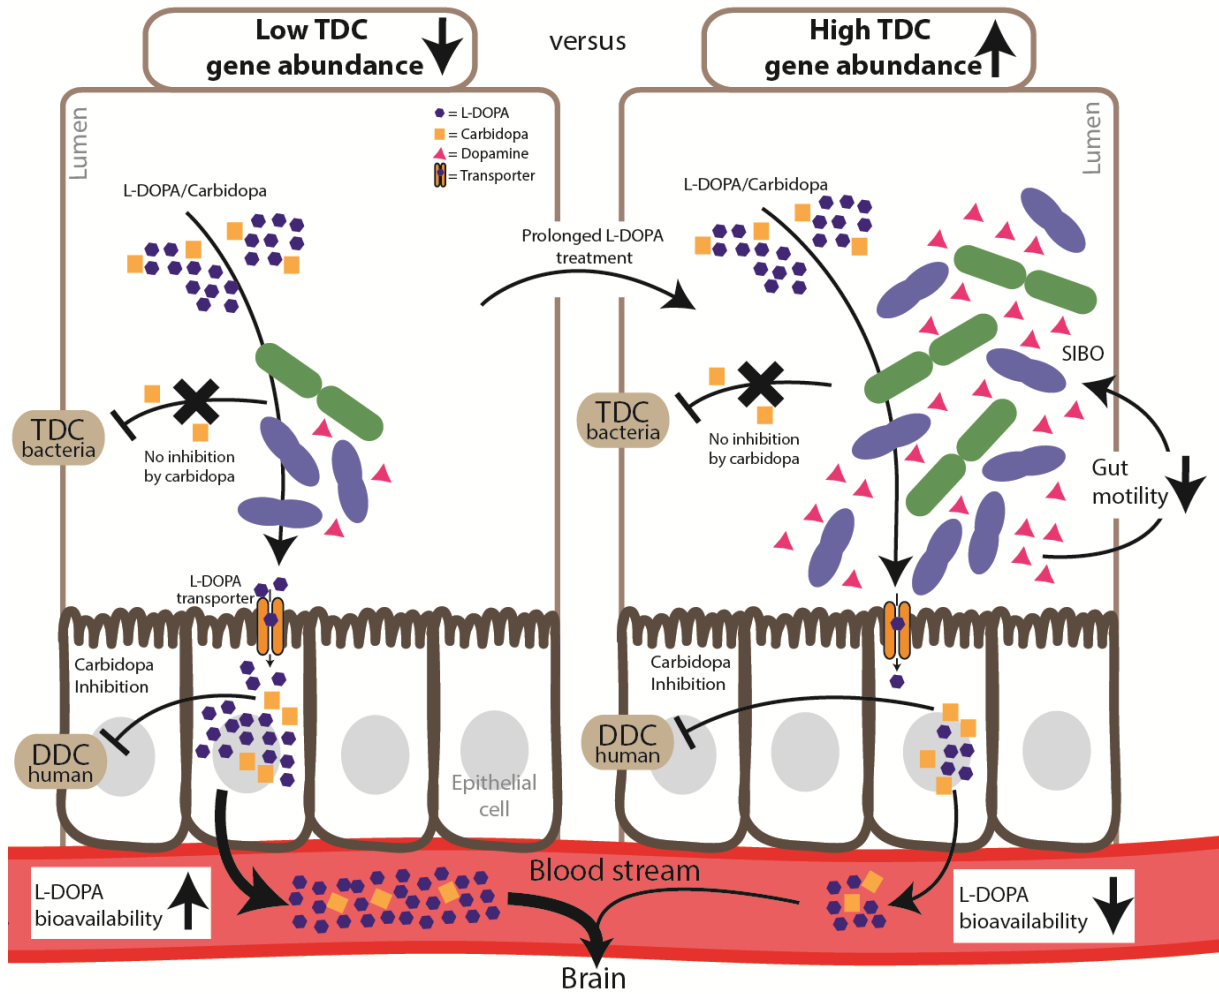

631

632 **Fig. 7. Higher abundance of tyrosine decarboxylase is cause and/or effect of fluctuating L-DOPA**  
633 **responsiveness?** A model representing two opposing situations, in which the proximal small intestine  
634 is colonized by low (left) or high abundance of tyrosine decarboxylase-encoding bacteria. The latter  
635 could result from or lead to increased individual L-DOPA dosage intake.

636

637

638 **Table 1. Michaelis-Menten kinetic parameters.** Enzyme kinetic parameters were determined by  
 639 Michaelis-Menten nonlinear regression model for L-DOPA and Tyrosine as substrates.  $\pm$  indicates the  
 640 standard error.

| <b>L-DOPA</b>                                                           | pH 5.0                   | pH 5.0                   | pH 4.5                               | pH 7.4         |
|-------------------------------------------------------------------------|--------------------------|--------------------------|--------------------------------------|----------------|
|                                                                         | <b>TDC<sub>EFS</sub></b> | <b>TDC<sub>EFM</sub></b> | <b><sup>P</sup>TDC<sub>EFM</sub></b> | <b>DDC</b>     |
| [E] (nM)                                                                | 10.00                    | 10.00                    | 10.00                                | 10.00          |
| K <sub>m</sub> (mM)                                                     | 3 $\pm$ 0.4              | 7.2 $\pm$ 0.8            | 0.4 $\pm$ 0.1                        | 0.1 $\pm$ 0.01 |
| V <sub>max</sub> ( $\mu$ M/min)                                         | 35.3 $\pm$ 1.4           | 25.5 $\pm$ 1.3           | 3.4 $\pm$ 0.2                        | 1.4 $\pm$ 0.03 |
| K <sub>cat</sub> (min <sup>-1</sup> )                                   | 3531 $\pm$ 137           | 2549 $\pm$ 133           | 342.4 $\pm$ 21                       | 136.9 $\pm$ 3  |
| K <sub>cat</sub> /K <sub>m</sub> (min <sup>-1</sup> /mM <sup>-1</sup> ) | 1160                     | 352                      | 764                                  | 1567           |
| R <sup>2</sup>                                                          | 0.978                    | 0.990                    | 0.621                                | 0.962          |

| <b>Tyrosine</b>                                                         | pH 5.0                   | pH 5.0                   | pH 4.5                               |
|-------------------------------------------------------------------------|--------------------------|--------------------------|--------------------------------------|
|                                                                         | <b>TDC<sub>EFS</sub></b> | <b>TDC<sub>EFM</sub></b> | <b><sup>P</sup>TDC<sub>EFM</sub></b> |
| [E] (nM)                                                                | 10.00                    | 10.00                    | 10.00                                |
| K <sub>m</sub> (mM)                                                     | 0.6 $\pm$ 0.1            | 1.5 $\pm$ 0.3            | 0.2 $\pm$ 0.05                       |
| V <sub>max</sub> ( $\mu$ M/min)                                         | 69.6 $\pm$ 2.9           | 22 $\pm$ 2.5             | 4.4 $\pm$ 0.2                        |
| K <sub>cat</sub> (min <sup>-1</sup> )                                   | 6963 $\pm$ 288           | 2204 $\pm$ 247           | 435.6 $\pm$ 19.2                     |
| K <sub>cat</sub> /K <sub>m</sub> (min <sup>-1</sup> /mM <sup>-1</sup> ) | 12216                    | 1493                     | 2558                                 |
| R <sup>2</sup>                                                          | 0.928                    | 0.902                    | 0.589                                |

641
